# Supplementary material
Source: PubMed Central journal article supplement (PMC3494194)
Supplement: supp_M112.017509_mcp.M112.017509-1.pdf [file supp_M112.017509_mcp.M112.017509-1.pdf]

### Predicted Transmembrane domains

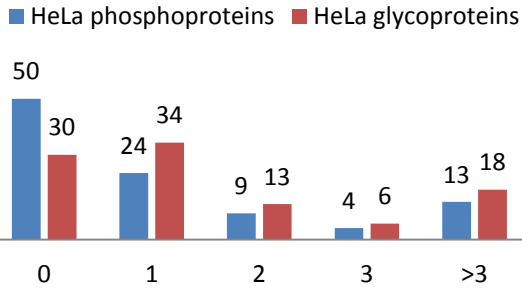

### Predicted Signal Sequence

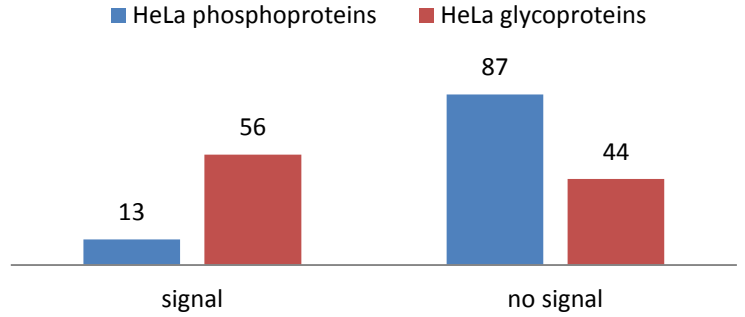

### Gene Ontology Subcellular Location

■ HeLa phosphoproteins ■ HeLa glycoproteins

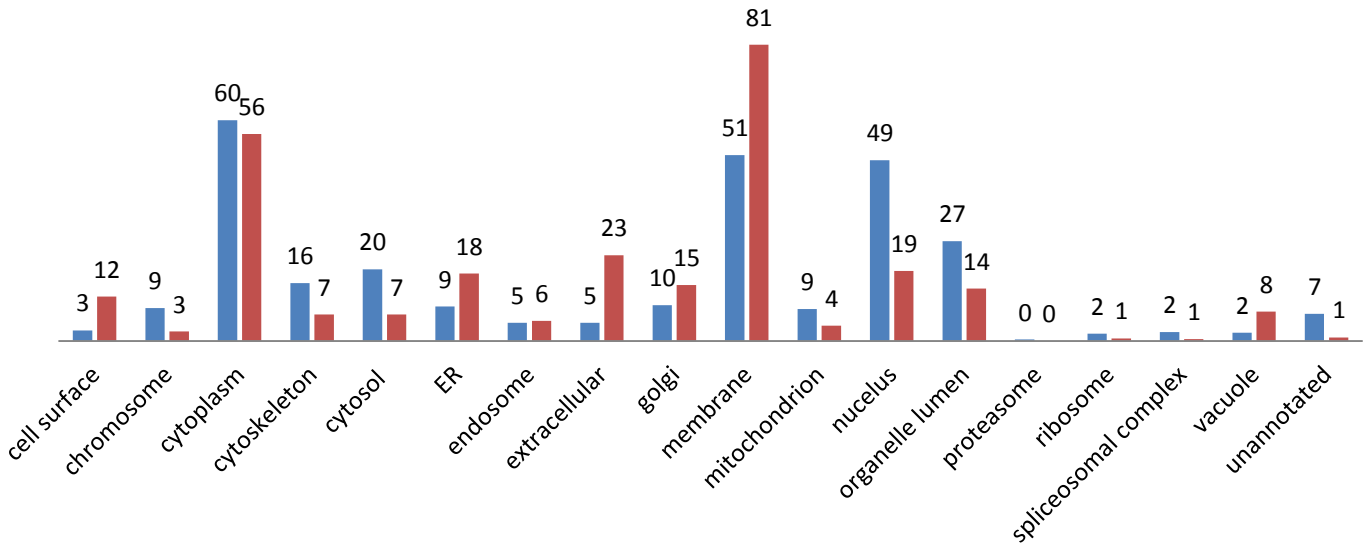

Supplementary Figure 1.
