# Supplementary material
Source: PubMed Central journal article supplement (PMC3494194)

## Predicted Transmembrane Domains

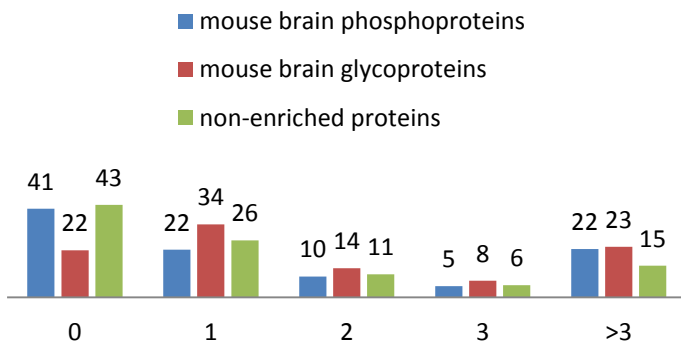

## Predicted Signal Sequence

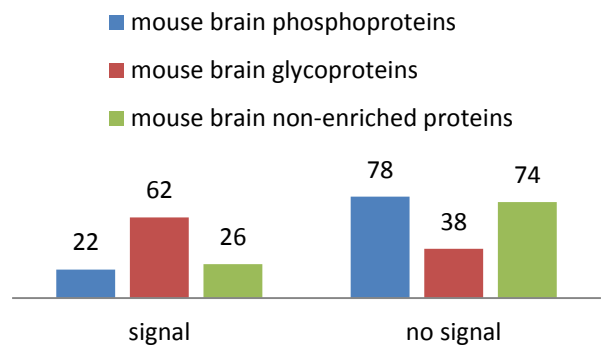

## Gene Ontology Subcellular Location

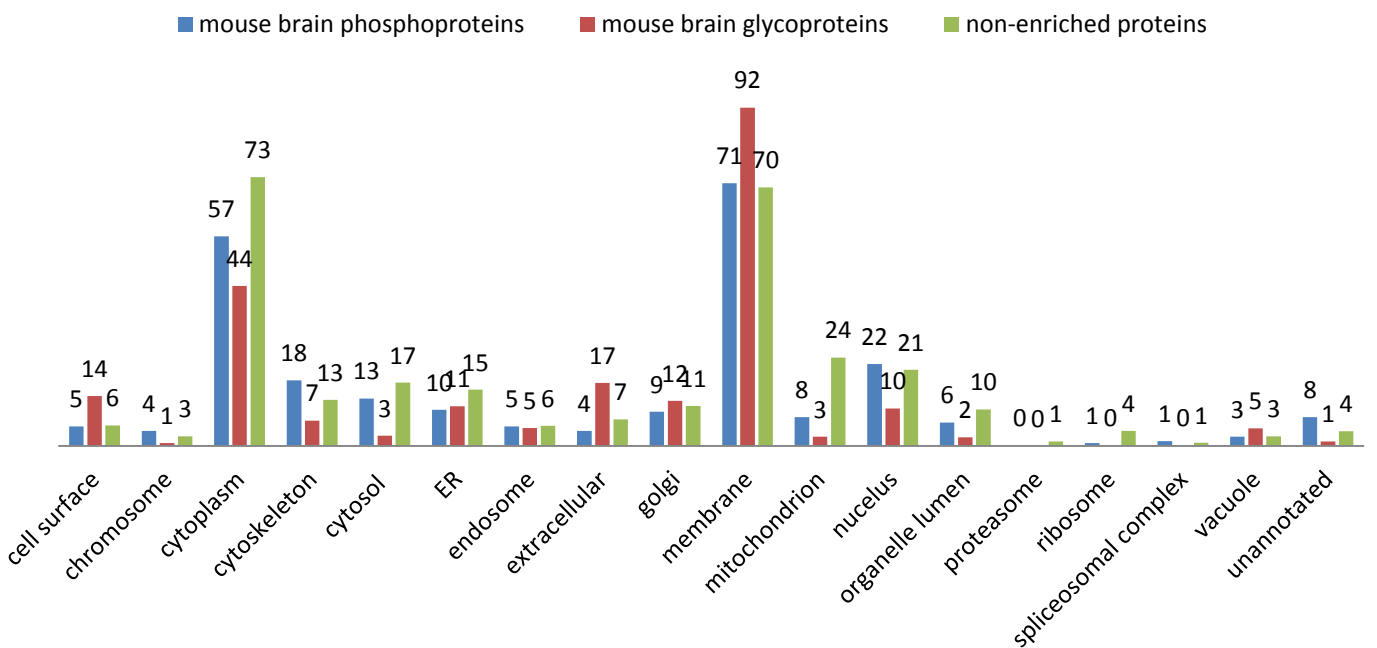

Supplement: supp_M112.017509_mcp.M112.017509-2.pdf [file supp_M112.017509_mcp.M112.017509-2.pdf]
