# Supplementary material
Source: PubMed Central journal article supplement (PMC3494194)

| #  | Motif        | Motif Score | Foreground Matches | Foreground Size | Background Matches | Background Size | Fold Increase |
|----|--------------|-------------|--------------------|-----------------|--------------------|-----------------|---------------|
| 1  | .....sP.K... | 27.75       | 65                 | 1320            | 3369               | 1078751         | 15.77         |
| 2  | .....sP....K | 23.88       | 53                 | 1255            | 3363               | 1075382         | 13.5          |
| 3  | .....sP..K.. | 23.67       | 47                 | 1202            | 3042               | 1072019         | 13.78         |
| 4  | .....sP..... | 16          | 397                | 1155            | 67574              | 1068977         | 5.44          |
| 5  | ...RR.s..... | 25.29       | 49                 | 758             | 4876               | 1001403         | 13.28         |
| 6  | .L.R.s.....  | 22.7        | 43                 | 709             | 5723               | 996527          | 10.56         |
| 7  | ...R.s.....  | 16          | 135                | 666             | 48243              | 990804          | 4.16          |
| 8  | .....s.E.... | 16          | 107                | 531             | 58528              | 942561          | 3.25          |
| 9  | .....s.D.... | 15.35       | 66                 | 424             | 44029              | 884033          | 3.13          |
| 10 | .....Gs..... | 8.96        | 59                 | 358             | 59024              | 840004          | 2.35          |
| 11 | ...K.s.....  | 7.38        | 43                 | 299             | 45115              | 780980          | 2.49          |

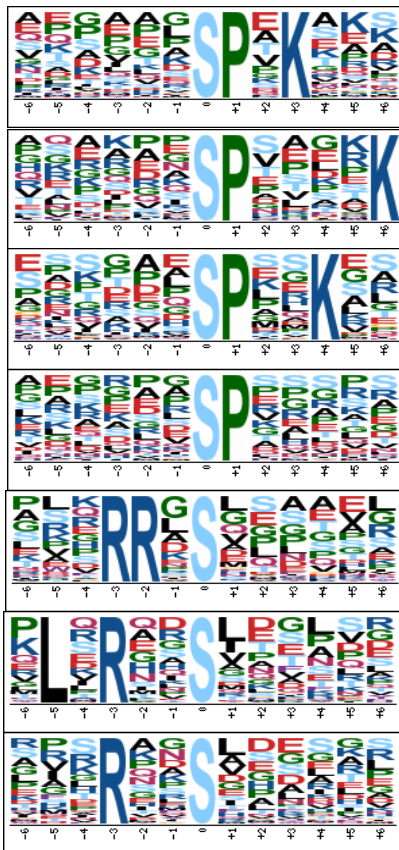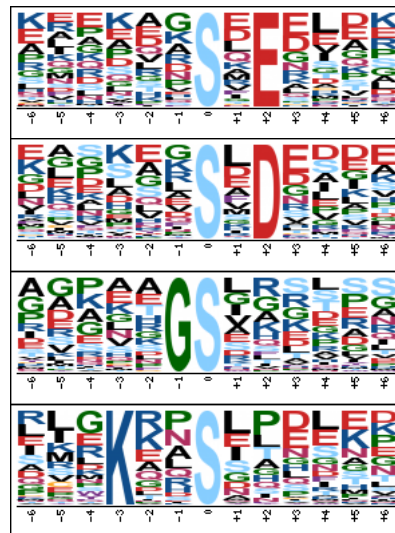

Supplement: supp_M112.017509_mcp.M112.017509-3.pdf [file supp_M112.017509_mcp.M112.017509-3.pdf]
